# Supplementary material
Source: PubMed Central journal article supplement (PMC6613344)
Supplement: supplementary_data_dez061.pdf [file supplementary_data_dez061.pdf]

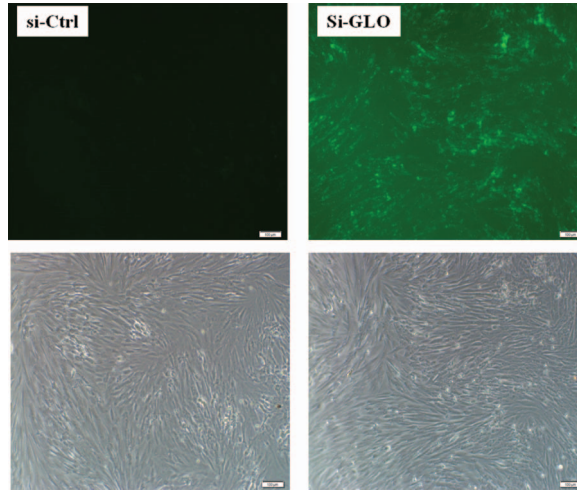

**Supplementary Figure S1** The transfection efficiency of siRNA in human decidual stromal cells. Cells were transfected with 100 nM si-GLO or scrambled siRNA (si-ctrl).
